# Supplementary material
Source: Springer Nature journal article supplement (https://www.springermedizin.de/resource/supplementary/12885_2011_3254_MOESM2_ESM.pdf/9463186)
Supplement: MOESM2 [file 9463186]

# CALD-UNS<sup>11</sup>

For every item on the following pages, put a circle around the number which best indicates whether you have needed help with this issue within the **last six months** as a result of having cancer. There are 5 possible answers to choose from:

## INSTRUCTIONS

|              |   |                                     |                                                                                       |
|--------------|---|-------------------------------------|---------------------------------------------------------------------------------------|
| No<br>Need   | 1 | <b>Not relevant to me</b>           | - This was not a problem for me as a result of having cancer.                         |
|              | 2 | <b>Satisfied with help received</b> | - I did need help with this, but my need for help was satisfied at the time.          |
| Some<br>Need | 3 | <b>Needed a little more help</b>    | - This item caused me concern or discomfort. I had a little need for additional help. |
|              | 4 | <b>Needed some more help</b>        | - This item caused me concern or discomfort. I had some need for additional help.     |
|              | 5 | <b>Needed a lot more help</b>       | - This item caused me concern or discomfort. I had a strong need for additional help. |

# SCNS-SF34<sup>8</sup>

## INSTRUCTIONS

To help us plan better services for people diagnosed with cancer, we are interested in whether or not needs which you may have faced as a result of having cancer have been met. For every item on the following pages, indicate whether you have needed help with this issue within the last month as a result of having cancer. Put a circle around the number which best describes whether you have needed help with this in the last month. There are 5 possible answers to choose from:

|              |   |                                                                                                                 |
|--------------|---|-----------------------------------------------------------------------------------------------------------------|
| NO<br>NEED   | 1 | <b>Not applicable</b> – This was not a problem for me as a result of having cancer.                             |
|              | 2 | <b>Satisfied</b> - I did need help with this, but my need for help was satisfied at the time.                   |
| SOME<br>NEED | 3 | <b>Low need</b> - This item caused me little concern or discomfort. I had little need for additional help.      |
|              | 4 | <b>Moderate need</b> – This item caused me some concern or discomfort. I had some need for additional help.     |
|              | 5 | <b>High need</b> - This item caused me a lot of concern or discomfort. I had a strong need for additional help. |
